# Supplementary material for: Durvalumab after Sequential High Dose Chemoradiotherapy versus Standard of Care (SoC) for Stage III NSCLC: A Bi-Centric Retrospective Comparison Focusing on Pulmonary Toxicity
Source: MDPI journal article supplement (doi:10.3390/cancers14133226), 2022-06-30
Supplement: s1 [file s1]

# Supplementary Materials: Durvalumab after Sequential High-Dose Chemoradiotherapy versus Standard of Care (SoC) for Stage III NSCLC: A Bi-Centric Retrospective Comparison Focusing on Pulmonary Toxicity

Romana Wass, Maximilian Hochmair, Bernhard Kaiser, Brane Grambozov, Petra Feuerstein, Gertraud Weiß, Raphaela Moosbrugger, Felix Sedlmayer, Bernd Lamprecht, Michael Studnicka and Franz Zehentmayr

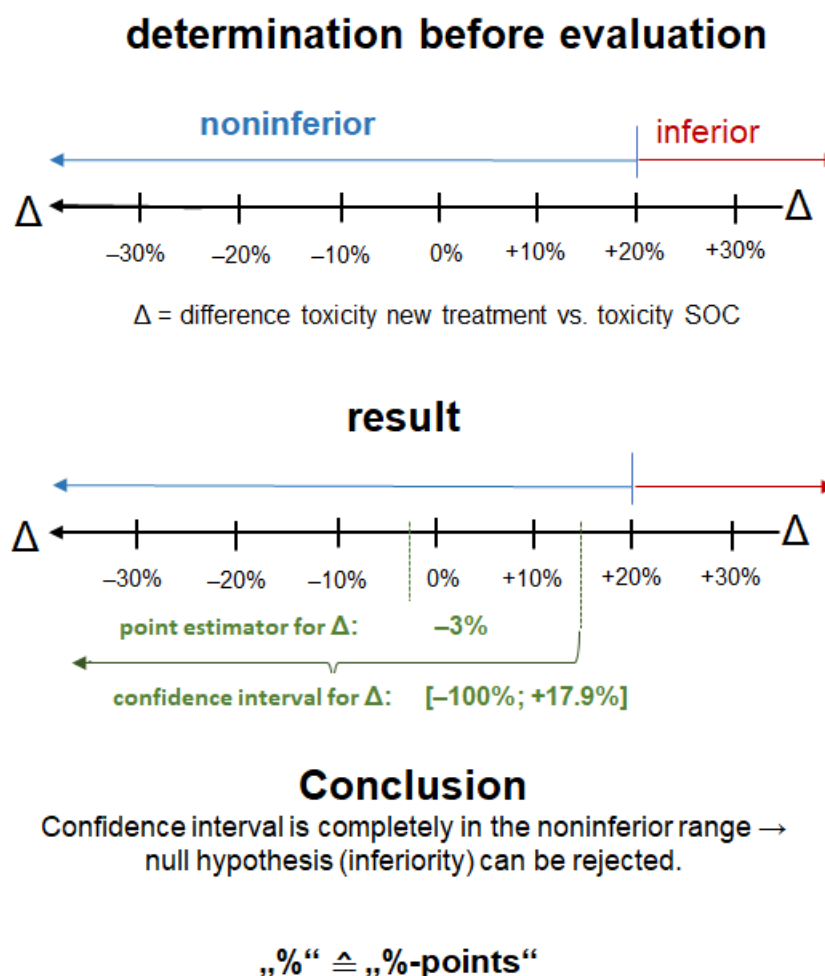

**Figure S1.** Non-inferiority trials test, whether an experimental intervention is as efficacious as standard treatment. Therefore, it is necessary to define a cut-off below which the experimental arm is regarded as “non-inferior”. In the current study, this value was set at +20% meaning that if the high-dose group had 20% or less excess pulmonary toxicity compared to standard treatment, it could be accepted as non-inferior. Hence, the one-sided 95% confidence interval may not include the range of 20% or higher.

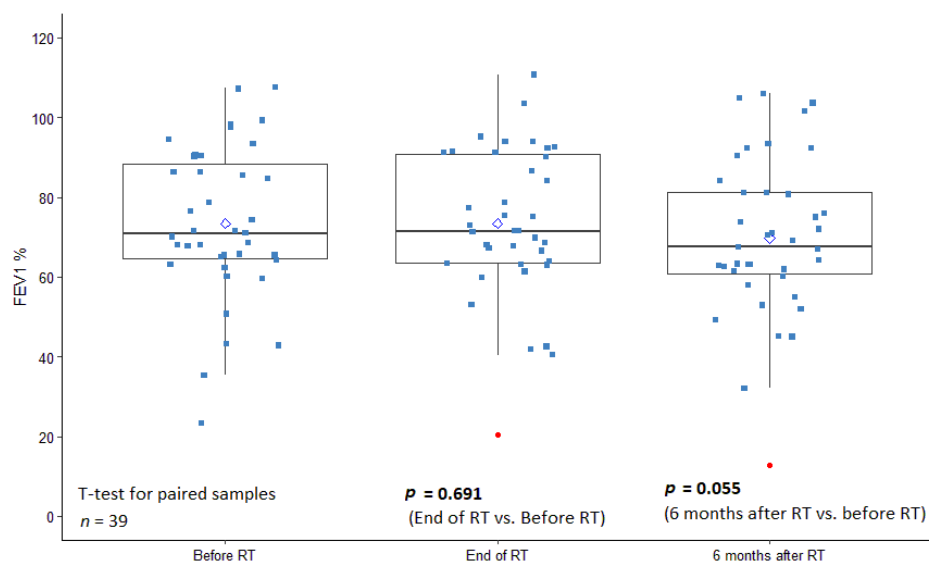

**Figure S2.** In the high-dose cohort, moderate changes in FEV1 could be observed at six months after RT compared to baseline (=before RT):  $n = 39$ , T-test for paired samples.

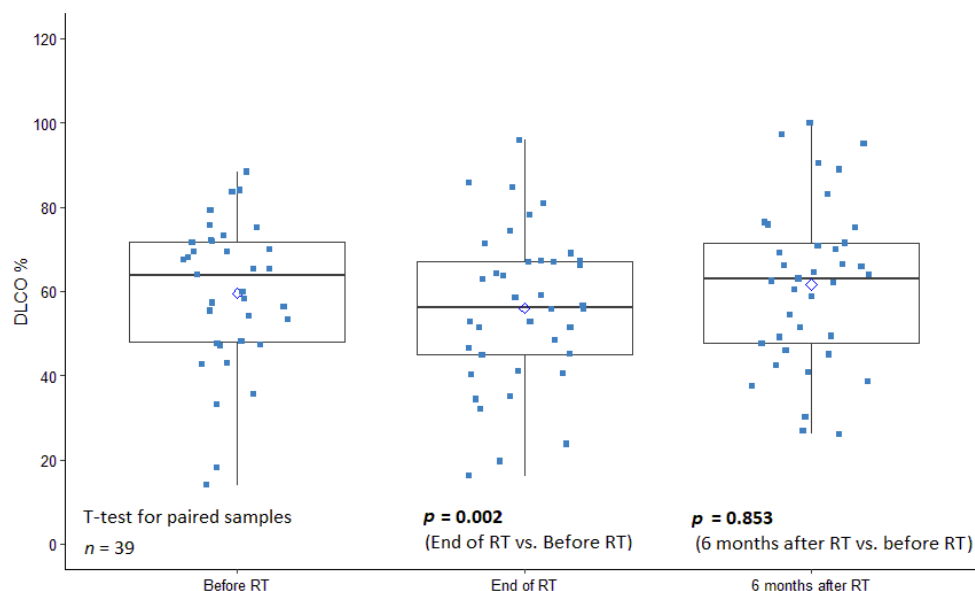

**Figure S3.** In the high-dose cohort, moderate changes in DLCO could be observed. The statistically significant decrease at the end of RT compared to baseline (=before RT) recovered six months later:  $n = 39$ , T-test for paired samples.

Table S1. Patient match.

| Patient Match: High Dose Patients = Red, SoC Patients Green |                             |       |                              |                                             |                                                      |                                           |
|-------------------------------------------------------------|-----------------------------|-------|------------------------------|---------------------------------------------|------------------------------------------------------|-------------------------------------------|
| Patient No.                                                 | Salzburg = 1,<br>Vienna = 0 | Age   | Sex: Male = 1,<br>Female = 0 | 0 = ECOG 0 or 1,<br>1 = ECOG 2 or<br>Higher | Smoking Status:                                      | Histology: 1 =<br>SCC, 2 = AC, 3<br>= NOS |
|                                                             |                             |       |                              |                                             | 1 = ex- or<br>Current<br>Smoker, 0 =<br>Never Smoker |                                           |
| 1                                                           | 1                           | 62.7  | 0                            | 0                                           | 1                                                    | 2                                         |
| 31                                                          | 0                           | 52.79 | 0                            | 0                                           | 1                                                    | 2                                         |
| 11                                                          | 0                           | 56.35 | 0                            | 0                                           | 1                                                    | 2                                         |
| 2                                                           | 1                           | 59.3  | 0                            | 0                                           | 1                                                    | 1                                         |
| 17                                                          | 0                           | 56.96 | 0                            | 0                                           | 1                                                    | 1                                         |
| 14                                                          | 0                           | 59.83 | 0                            | 0                                           | 1                                                    | 1                                         |
| 4                                                           | 0                           | 49.92 | 0                            | 0                                           | 1                                                    | 1                                         |
| 3                                                           | 1                           | 61.1  | 0                            | 0                                           | 1                                                    | 2                                         |
| 5                                                           | 0                           | 57.01 | 0                            | 0                                           | 1                                                    | 2                                         |
| 8                                                           | 0                           | 53.3  | 0                            | 0                                           | 1                                                    | 2                                         |
| 27                                                          | 0                           | 55.14 | 0                            | 0                                           | 1                                                    | 2                                         |
| 33                                                          | 0                           | 57.96 | 0                            | 1                                           | 1                                                    | 2                                         |
| 4                                                           | 1                           | 71.93 | 0                            | 0                                           | 1                                                    | 2                                         |
| 6                                                           | 0                           | 65.01 | 0                            | 0                                           | 1                                                    | 2                                         |
| 5                                                           | 1                           | 73.98 | 0                            | 0                                           | 1                                                    | 1                                         |
| 25                                                          | 0                           | 72.9  | 0                            | 0                                           | 1                                                    | 2                                         |
| 6                                                           | 1                           | 69.37 | 0                            | 0                                           | 1                                                    | 1                                         |
| 13                                                          | 0                           | 59.35 | 0                            | 0                                           | 1                                                    | 1                                         |
| 10                                                          | 0                           | 74.71 | 0                            | 0                                           | 1                                                    | 1                                         |
| 7                                                           | 1                           | 72.93 | 0                            | 0                                           | 1                                                    | 2                                         |
| 2                                                           | 0                           | 79.47 | 0                            | 0                                           | 1                                                    | 2                                         |
| 8                                                           | 1                           | 69.73 | 0                            | 0                                           | 0                                                    | 1                                         |
| 9                                                           | 1                           | 69.21 | 0                            | 0                                           | 1                                                    | 2                                         |
| 3                                                           | 0                           | 66.51 | 0                            | 0                                           | 1                                                    | 2                                         |
| 10                                                          | 1                           | 72.54 | 0                            | 0                                           | 1                                                    | 2                                         |
| 28                                                          | 0                           | 74.62 | 0                            | 0                                           | 1                                                    | 2                                         |
| 11                                                          | 1                           | 73.68 | 0                            | 0                                           | 0                                                    | 2                                         |
| 12                                                          | 0                           | 80.76 | 0                            | 0                                           | 0                                                    | 3                                         |
| 12                                                          | 1                           | 70.09 | 0                            | 0                                           | 1                                                    | 2                                         |
| 18                                                          | 0                           | 69.1  | 0                            | 0                                           | 1                                                    | 2                                         |
| 13                                                          | 1                           | 64.95 | 1                            | 0                                           | 1                                                    | 1                                         |
| 14                                                          | 1                           | 63.6  | 1                            | 0                                           | 1                                                    | 1                                         |
| 7                                                           | 0                           | 63.17 | 1                            | 0                                           | 1                                                    | 1                                         |
| 15                                                          | 1                           | 67.09 | 1                            | 0                                           | 1                                                    | 2                                         |
| 1                                                           | 0                           | 75.74 | 1                            | 0                                           | 1                                                    | 2                                         |
| 16                                                          | 1                           | 77.22 | 1                            | 0                                           | 0                                                    | 2                                         |
| 17                                                          | 1                           | 70.98 | 1                            | 0                                           | 1                                                    | 2                                         |
| 19                                                          | 0                           | 62.72 | 1                            | 0                                           | 1                                                    | 2                                         |
| 18                                                          | 1                           | 70.56 | 1                            | 0                                           | 1                                                    | 1                                         |
| 15                                                          | 0                           | 67.09 | 1                            | 0                                           | 1                                                    | 1                                         |
| 19                                                          | 1                           | 32.61 | 1                            | 0                                           | 1                                                    | 2                                         |
| 9                                                           | 0                           | 46.54 | 1                            | 0                                           | 1                                                    | 1                                         |
| 20                                                          | 1                           | 68.74 | 1                            | 0                                           | 1                                                    | 1                                         |
| 16                                                          | 0                           | 62.81 | 1                            | 0                                           | 1                                                    | 1                                         |

|    |   |       |   |   |   |   |
|----|---|-------|---|---|---|---|
| 21 | 1 | 59.06 | 1 | 0 | 1 | 1 |
| 34 | 0 | 52.6  | 1 | 0 | 1 | 1 |
| 22 | 1 | 66.08 | 1 | 0 | 1 | 1 |
| 20 | 0 | 65.91 | 1 | 0 | 1 | 1 |
| 23 | 1 | 70.24 | 1 | 0 | 1 | 2 |
| 21 | 0 | 69.16 | 1 | 0 | 1 | 2 |
| 24 | 1 | 63.16 | 1 | 0 | 1 | 1 |
| 23 | 0 | 66.05 | 1 | 0 | 1 | 3 |
| 25 | 1 | 58.89 | 1 | 0 | 1 | 2 |
| 26 | 1 | 79.54 | 1 | 0 | 1 | 1 |
| 22 | 0 | 76.87 | 1 | 0 | 1 | 1 |
| 27 | 1 | 52.63 | 1 | 0 | 0 | 2 |
| 28 | 1 | 71.00 | 1 | 0 | 1 | 1 |
| 29 | 1 | 73.11 | 1 | 0 | 1 | 1 |
| 29 | 0 | 71.09 | 1 | 0 | 1 | 1 |
| 30 | 1 | 72.73 | 1 | 0 | 1 | 2 |
| 31 | 1 | 56.86 | 1 | 0 | 1 | 2 |
| 24 | 0 | 61.71 | 1 | 0 | 1 | 2 |
| 32 | 1 | 62.79 | 1 | 0 | 1 | 1 |
| 30 | 0 | 66.83 | 1 | 0 | 1 | 1 |
| 33 | 1 | 83.41 | 1 | 0 | 1 | 2 |
| 34 | 1 | 50.97 | 1 | 0 | 1 | 2 |
| 32 | 0 | 46.67 | 1 | 0 | 1 | 3 |
| 35 | 1 | 56.2  | 1 | 0 | 1 | 2 |
| 35 | 0 | 60.52 | 1 | 0 | 1 | 2 |
| 36 | 1 | 63.23 | 1 | 0 | 1 | 2 |
| 26 | 0 | 62.92 | 1 | 0 | 1 | 2 |
| 37 | 1 | 72.79 | 1 | 0 | 0 | 2 |
| 38 | 1 | 68.01 | 1 | 0 | 1 | 2 |
| 39 | 1 | 57.54 | 1 | 0 | 1 | 2 |
| 40 | 1 | 66.83 | 1 | 0 | 1 | 2 |
| 41 | 1 | 59.89 | 1 | 0 | 1 | 1 |
| 36 | 0 | 56.03 | 1 | 0 | 1 | 1 |
| 42 | 1 | 62.09 | 1 | 0 | 1 | 2 |
